1 **BIOLOGICAL SCIENCES: Microbiology**

2

3 **A specific non-bisphosphonate inhibitor of the bifunctional farnesyl/geranylgeranyl**  
4 **diphosphate synthase in malaria parasites**

5

6 Jolyn E. Gisselberg<sup>1</sup>, Zachary Herrera<sup>1</sup>, Lindsey Orchard<sup>4</sup>, Manuel Llinás<sup>4,5,6</sup>, and Ellen Yeh<sup>1,2,3\*</sup>

7

8 <sup>1</sup>Department of Biochemistry, <sup>2</sup>Pathology, and <sup>3</sup>Microbiology and Immunology, Stanford  
9 Medical School, Stanford University, Stanford, CA 94025, USA

10

11 <sup>4</sup>Department of Biochemistry & Molecular Biology, <sup>5</sup>Department of Chemistry and <sup>6</sup>Huck  
12 Center for Malaria Research, Pennsylvania State University, University Park, PA 16802

13

14 \*Corresponding author: [ellenyeh@stanford.edu](mailto:ellenyeh@stanford.edu)

15

16 **Keywords: malaria, drug discovery, and high-throughput screening, non-bisphosphonate**  
17 **inhibitor**

## 18 **Abstract**

19 There are multiple validated antimalarial drug targets in isoprenoid biosynthetic pathways. Using  
20 a growth rescue screen, we identified MMV019313 as an inhibitor of isoprenoid biosynthesis in  
21 *Plasmodium falciparum* parasites that cause malaria. We demonstrate that the molecular target of  
22 MMV019313 is the *P. falciparum* bifunctional farnesyl and geranylgeranyl diphosphate synthase  
23 (FPPS/GGPPS): Both an S228T variant and overexpression of wildtype *Pf*FPPS/GGPPS  
24 conferred resistance to MMV019313. MMV019313 also inhibited the activity of purified  
25 *Pf*FPPS/GGPPS. *Pf*FPPS/GGPPS has already been validated as an antimalarial drug target since  
26 its inhibition by bisphosphonates, a class of drugs that inhibits human FPPS, was shown to clear  
27 parasitemia in a mouse malaria model. Though bisphosphonates are clinically used for treating  
28 osteoporosis, MMV019313 has significant advantages over bisphosphonates for antimalarial  
29 drug development. MMV019313 has superior physicochemical properties compared to charged  
30 bisphosphonates that have poor bioavailability and strong bone affinity. We also show that it is  
31 highly selective for *Pf*FPPS/GGPPS and showed no activity against human FPPS or GGPPS.  
32 Inhibition of *Pf*FPPS/GGPPS by MMV019313, but not bisphosphonates, was disrupted in the  
33 S228T variant, demonstrating that MMV019313 and bisphosphonates have distinct modes-of-  
34 inhibition against *Pf*FPPS/GGPPS. In addition, we describe two methodological improvements: a  
35 more sensitive chemical rescue screen for identifying isoprenoid inhibitors and the first report  
36 using chemical mutagenesis for drug resistance selection in *Plasmodium*. Altogether  
37 MMV019313 is the first specific, non-bisphosphonate inhibitor of *Pf*FPPS/GGPPS. Our findings  
38 uncover a new small molecule binding site in this important antimalarial drug target and provide  
39 a promising starting point for development of *Plasmodium*-specific FPPS/GGPPS inhibitors.  
40

## 41 **Significance Statement**

42 There is an urgent need for antimalarials with novel mechanisms-of-action to circumvent  
43 resistance to frontline drugs. Isoprenoid biosynthetic pathways are essential for *Plasmodium*  
44 (malaria) parasites and contain multiple validated drug targets. We identify a new antimalarial  
45 compound that inhibits a key branchpoint enzyme in isoprenoid biosynthesis. Our compound has  
46 significant advantages over bisphosphonate inhibitors that inhibit the same drug target with  
47 improved drug properties and specificity for the *Plasmodium* enzyme over human homologs.  
48 Our findings uncover a new “druggable” site in this important antimalarial drug target and  
49 provide a chemical starting point for development of *Plasmodium*-specific FPPS/GGPPS  
50 inhibitors.  
51

## 52 **Introduction**

53 There is an urgent need for antimalarials with novel mechanisms-of-action to circumvent  
54 resistance to frontline drugs. The biosynthesis of cellular isoprenoids is an essential process in  
55 *Plasmodium* parasites that cause malaria. A number of antimalarial compounds target enzymes  
56 in isoprenoid biosynthetic pathways leading to parasite growth inhibition. First, *Plasmodium*  
57 parasites depend on the 7-enzyme prokaryotic 2-C-methyl-D-erythritol 4-phosphate (MEP)  
58 pathway in its plastid organelle, the apicoplast, to produce isopentenyl pyrophosphate (IPP) and  
59 its isomer dimethylallyl pyrophosphate (DMAPP) (1). IPP and DMAPP are the C5 building  
60 blocks for all isoprenoids. The antibiotic fosmidomycin inhibits the MEP enzyme, Dxr/IspC, in  
61 both bacteria and *Plasmodium* parasites (1).

62 Second, at least three isoprenoid synthases (PF3D7\_1128400.1, PF3D7\_0202700,  
63 PF3D7\_0826400) catalyze the condensation of IPP and DMAPP into longer prenyl chains (2-4).

64 In particular, farnesyl pyrophosphate synthase (FPPS) and geranylgeranyl pyrophosphate  
65 synthase (GGPPS) are key branch point enzymes that synthesize C15 and C20 prenyl chains,  
66 respectively, for multiple downstream enzymes. Nitrogen-containing bisphosphonates,  
67 blockbuster drugs which inhibit human FPPS, also inhibit the bifunctional FPPS/GGPPS found  
68 in *Plasmodium* parasites (5-9).

69 Finally, prenyl chains are cyclized and/or conjugated to small molecule and protein  
70 scaffolds by a variety of prenyltransferases to biosynthesize final isoprenoid products required  
71 for parasite growth and replication. Tetrahydroquinolines (THQ) have been shown to potently  
72 inhibit the *Plasmodium* protein farnesyltransferase (10-12). Other inhibitors may interfere with  
73 isoprenoid biosynthesis indirectly by disrupting transporters that supply starting substrates or  
74 export products or blocking pathways that provide cofactors for isoprenoid biosynthetic  
75 enzymes.

76 Importantly fosmidomycin, bisphosphonates, and tetrahydroquinolines have all shown  
77 efficacy in mouse models of malaria infection, validating the key importance of isoprenoid  
78 biosynthesis as an antimalarial drug target (1, 5, 6, 10). Fosmidomycin is currently being tested  
79 in human clinical trials, while a THQ lead candidate was investigated in preclinical studies (10,  
80 13). However, novel chemical scaffolds that disrupt isoprenoid biosynthetic pathways in  
81 *Plasmodium* remain desirable to overcome unfavorable drug properties of these known  
82 inhibitors. For example, bisphosphonates avidly bind bone mineral, and both fosmidomycin and  
83 THQs have short half-lives *in vivo* (14-16).

84 In 2011 the Medicine for Malaria Venture (MMV) distributed the Open-Access Malaria  
85 Box to accelerate antimalarial drug discovery (17). The Malaria Box consists of 400 structurally  
86 diverse compounds, curated from >20,000 hits generated from large-scale screens, that inhibit  
87 the growth of blood-stage *Plasmodium falciparum* parasites (18-20). A major goal of sharing  
88 these compounds was to facilitate elucidation of their antimalarial mechanism-of-action and  
89 open new classes of validated chemical scaffolds and drug targets. Compounds that disrupt  
90 isoprenoid metabolism can be detected by “rescue” of their growth inhibition upon  
91 supplementation of isoprenoids in the growth media (21). Previously, we and two other groups  
92 screened the Malaria Box for compounds whose growth inhibition were rescued by addition of  
93 IPP and identified MMV008138 (22, 23). We and our collaborators demonstrated that  
94 MMV008138 inhibits IspD, an enzyme in the MEP pathway that produces IPP (23).

95 Using a quantitative high-throughput screen (qHTS), we report a second compound in the  
96 Malaria Box, MMV019313, that shows an IPP rescue phenotype but was not identified in  
97 screens performed by other groups (22, 24, 25). We demonstrate that the target of MMV019313  
98 is the *P. falciparum* FPPS/GGPPS, a cytosolic isoprenoid synthase that utilizes IPP and the key  
99 branch point enzyme in isoprenoid biosynthesis in parasites. MMV019313 represents the first  
100 new class of non-bisphosphonate inhibitors of *Pf*FPPS/GGPPS.

## 101 102 **Results**

### 103 104 **A quantitative high-throughput screen (qHTS) for growth and IPP rescue identifies** 105 **MMV019313 as an inhibitor of isoprenoid biosynthesis**

106 Previous IPP rescue screens of the Malaria Box tested compounds at a single, high  
107 concentration >5  $\mu$ M (22, 24, 25). While testing compounds at a single concentration is useful  
108 for identifying phenotypes that occur at a threshold concentration (e.g. growth inhibition),  
109 growth rescue is expected to occur within a specific range of concentrations. For example,

110 doxycycline inhibits *P. falciparum* growth with an  $EC_{50}$  = 0.3  $\mu$ M that increases to 3.2  $\mu$ M upon  
111 addition of IPP (21). At concentrations <0.3  $\mu$ M, doxycycline does not cause growth inhibition.  
112 However, at concentrations >3.2  $\mu$ M, it is no longer specific for its target and causes growth  
113 inhibition through additional targets that cannot be IPP rescued. Therefore the concentration  
114 range in which IPP rescue can be observed is greater than the  $EC_{50}$  of the compound for its  
115 specific, IPP-rescuable target but less than that for any nonspecific targets.

116 To increase the sensitivity for detecting IPP chemical rescue, we screened the Malaria  
117 Box for growth inhibition of blood-stage *P. falciparum* in the presence and absence of IPP over  
118 8-12 drug concentrations from 0.01-27  $\mu$ M (Table S1). Of 397 compounds tested (3 compounds  
119 were not available), 383 showed growth inhibition at  $\leq$ 27  $\mu$ M. Initial hits showing IPP rescue of  
120 growth inhibition at one or more drug concentrations were commercially sourced and retested.  
121 Along with the previously reported compound, MMV008138, we confirmed a second compound  
122 in the Malaria Box showing an IPP rescue phenotype, MMV019313 (Figure 1A). MMV019313  
123 inhibited *P. falciparum* growth measured in a single replication cycle with  $EC_{50}$ =268 nM (250-  
124 289 nM) in the absence of IPP; in the presence of IPP, the  $EC_{50}$  was over 13-fold more at 3.6  $\mu$ M  
125 (3.2-4.0  $\mu$ M) (Figure 1B). Notably, at concentrations >3.6  $\mu$ M, MMV019313 inhibits a  
126 nonspecific target that can no longer be IPP rescued, which explains why it was not identified in  
127 previous screens.

128 An unusual feature of blood-stage *Plasmodium* is that IPP can rescue complete loss of the  
129 apicoplast, the plastid organelle which houses the MEP pathway, since production of IPP is the  
130 only essential function of the apicoplast. Compounds like doxycycline that disrupt apicoplast  
131 biogenesis cause growth inhibition rescued by IPP and result in parasites lacking an apicoplast  
132 (21). In contrast, inhibitors of isoprenoid biosynthesis, like fosmidomycin and MMV008138,  
133 cause growth inhibition rescued by IPP with an intact apicoplast (26). We determined whether  
134 MMV019313 disrupted the biogenesis of the apicoplast. Both the replication of the apicoplast  
135 genome and import of an apicoplast-targeted GFP were intact in MMV019313-treated and IPP-  
136 rescued parasites (Figure S1; 21). Altogether MMV019313 causes growth inhibition rescued by  
137 IPP with no defect in apicoplast biogenesis, suggesting that, like fosmidomycin and  
138 MMV008138, MMV019313 blocks isoprenoid biosynthesis (23).

139

#### 140 **MMV019313-resistant parasites contain a mutation in the geranylgeranyl diphosphate** 141 **synthase**

142 To gain further insight into the mechanism-of-action of MMV019313, we identified  
143 mutations that confer resistance to MMV019313. Our initial attempt to select drug-resistant  
144 parasites from a bulk culture of  $10^{10}$  parasites was not successful, though this same protocol was  
145 effective in selecting drug resistance against MMV008138 when performed in parallel (23).  
146 Therefore, we turned to chemical mutagenesis to increase the likelihood of selecting  
147 MMV019313-resistant parasites. Chemical mutagenesis has been successfully employed to  
148 perform genetic screens in *T. gondii* but, to our knowledge, has not been used in *Plasmodium*  
149 parasites (27). We treated  $10^8$  *P. falciparum* W2 parasites with sub-lethal doses of ethyl  
150 methanesulfonate (EMS), an alkylating agent. Because EMS is unstable, we tested a fresh batch  
151 of mutagen immediately prior to treatment in a standard parasite growth inhibition assay to  
152 determine its  $EC_{50}$ . We then selected the  $EC_{50}$  as the highest mutagen concentration used and  
153 also tested several lower concentrations by serially diluting 3-fold. These concentrations were  
154 selected to maximize the frequency of drug-resistant mutations while minimizing lethal  
155 mutations that would result in a smaller pool of starting parasites or nonspecific passenger

156 mutations that would confound identification of causative mutations. Following mutagenesis,  
157 parasites were continuously selected with a dose of MMV019313 equal to its  $EC_{75}$  in the  
158 presence of IPP for 7 or 32 days before removal of the drug. This concentration was chosen to  
159 maximize selection pressure for developing resistance in the IPP-rescuable target, while  
160 minimizing that for developing resistance in nonspecific targets.

161 Resistant parasites emerged in all mutagenized cultures one week after drug removal. In  
162 these resistant populations, MMV019313 showed  $EC_{50}$  values that ranged from 3-9-fold greater  
163 than that observed in the initial susceptible population. Growth inhibition of two MMV019313-  
164 resistant populations which showed the highest levels of resistance at the lowest EMS  
165 concentrations used, designated 019313R1 and 019313R2, are shown in Figure 2A. Significantly  
166 the  $EC_{50}$  of MMV019313 in 019313R1 and 019313R2 was similar to that observed in susceptible  
167 strains in the presence of IPP, and growth inhibition could no longer be rescued by addition of  
168 IPP (Figure S2). These results suggest that, as expected, 019313R1 and 019313R2 populations  
169 were completely resistant to inhibition of its specific IPP-rescuable target but had not developed  
170 resistance to inhibition of additional nonspecific targets. This is the first example of using  
171 chemical mutagenesis to aid selection of drug-resistant parasites in *P. falciparum*.

172 019313R1, 019313R2, and their respective mutagenized parent strains used to initiate  
173 drug selection, WT1 and WT2, were subjected to whole-genome sequencing. Comparison of the  
174 resistant and parent genome sequences identified a single nucleotide variant (SNV) which was  
175 present in 100% of reads in 019313R1 and 63% of reads in 019313R2 but not present in either  
176 susceptible parent genomes (Table 1). No other SNV were detected at >40% prevalence in either  
177 resistant populations relative to the corresponding parent populations. The identified SNV was a  
178 T-to-A mutation in the gene PF3D7\_1128400 characterized as a bifunctional FPPS/GGPPS and  
179 resulted in a Ser228-to-Thr change in the protein (Figure 2B; 2, 4). IPP is a known substrate of  
180 the FPPS/GGPPS, and in the primary sequence Ser228 is adjacent to conserved KT residues and  
181 an Asp-rich region required for catalysis in all homologous FPPS and GGPPS enzymes (Figure  
182 2C). *Pf*FPPS/GGPPS was a strong candidate for further validation as the molecular target of  
183 MMV019313.

184

### 185 **Overexpression and an S228T variant of *Pf*FPPS/GGPPS confers resistance to** 186 **MMV019313**

187 We determined whether overexpression of wildtype *Pf*FPPS/GGPPS was sufficient to  
188 confer resistance to MMV019313. A transgene encoding FPPS/GGPPS-GFP under the control of  
189 either the ribosomal L2 protein (*RL2*; PF3D7\_1132700) or calmodulin (*CaM*; PF3D7\_1434200)  
190 promoter was integrated into an engineered *attB* locus in Dd2<sup>attB</sup> parasites (28). Expression of the  
191 CaM promoter is 10 to 50-fold greater across the life cycle than that of the RL2 promoter based  
192 on RNA-seq data, resulting in appreciably greater FPPS/GGPPS-GFP protein (Figure S3A; 29).  
193 Therefore, we compared the effect of no, moderate (RL2), and high (CaM) levels of  
194 FPPS/GGPPS-GFP overexpression on susceptibility to MMV019313. As shown in Figure 3A,  
195 overexpression of FPPS/GGPPS-GFP results in a dose-dependent increase in the  $EC_{50}$  of  
196 MMV019313 with intermediate-level resistance to MMV019313 observed in the RL2-  
197 FPPS/GGPPS-GFP strain and high-level resistance observed in the CaM-FPPS/GGPPS-GFP  
198 strain. Notably growth inhibition by MMV019313 in the CaM-FPPS/GGPPS-GFP strain could  
199 no longer be rescued by IPP, indicating that complete resistance to inhibition of the specific IPP-  
200 rescuable target had been achieved (Figure S3B).



201 We also determined whether the S228T variant of GGPPS confers MMV019313  
202 resistance. Initially we attempted to introduce the S228T mutation into the *fpps/ggpps* gene in the  
203 *P. falciparum* genome using CRISPR-Cas9 mutagenesis but were unable to recover mutant  
204 parasites. As an alternative, we overexpressed the FPPS/GGPPS(S228T)-GFP variant using the  
205 “moderate” RL2 promoter and compared its effect on MMV019313 susceptibility with that of  
206 the wild-type RL2-FPPS/GGPPS-GFP. Overexpression of the FPPS/GGPPS(S228T)-GFP  
207 variant, even at moderate levels, caused an 18-fold increase in the  $EC_{50}$  which did not increase  
208 further with IPP rescue, indicating that complete resistance to inhibition of the specific, IPP-  
209 rescuable target had been achieved (Figure 3B and S3C). Because moderate overexpression of  
210 the S228T variant caused greater MMV019313 resistance than moderate overexpression of  
211 wildtype *Pf*FPPS/GGPPS, we conclude that the S228T variant is sufficient to confer resistance  
212 independent of overexpression. Altogether these results clearly demonstrated that the  
213 mechanism-of-action of MMV019313 is dependent on *Pf*FPPS/GGPPS.

214

### 215 **MMV019313 specifically inhibits the enzymatic activity of *Pf*FPPS/GGPPS**

216 To confirm that *Pf*FPPS/GGPPS is the molecular target of MMV019313, we directly  
217 measured MMV019313 inhibition in enzymatic assays. Consistent with a previous report,  
218 purified *Pf*FPPS/GGPPS catalyzed the production of both farnesyl(C15)-PP and  
219 geranylgeranyl(C20)-PP (2). To measure the inhibitory effect of MMV019313, we determined  
220 its  $IC_{50}$  for FPP and GGPP production in two conditions. In the first “non-saturating” condition,  
221 substrate concentrations equaled  $K_M$  values (Figure S4), the concentration at which the rate of  
222 reaction is half-maximal. In the second “ $k_{cat}$ ” condition, substrate concentrations were saturating  
223 and the rate of reaction was maximal. Measuring inhibitor effects in both “non-saturating” and  
224 “ $k_{cat}$ ” conditions increases the sensitivity for detecting different types of inhibitors (competitive,  
225 non-competitive, uncompetitive). We found the  $IC_{50}$  value was 330 nM for FPP production  
226 under “non-saturating” conditions, comparable to its  $EC_{50}$  value in cellular growth inhibition  
227 assays (Figure 1B and S5). MMV019313 was identified by its IPP rescue phenotype in cell  
228 growth assays wherein addition of exogenous substrate increases enzymatic rates, indicating that  
229 physiological conditions are likely sub-saturating. Therefore its  $IC_{50}$  value measured in sub-  
230 saturating condition is more relevant for comparison to its  $EC_{50}$  value for growth inhibition.  
231 Under “ $k_{cat}$ ” conditions,  $IC_{50}$  values were 2.0  $\mu$ M for FPP production and 9.8  $\mu$ M for GGPP  
232 production (Figure 4A-B).

233 Since inhibition was detectable in both conditions, assays of mutant and human enzymes  
234 were performed at saturating conditions which gives higher signal-to-noise. Significantly  
235 MMV019313 at concentrations up to 200  $\mu$ M did not inhibit human FPPS or GGPPS activity,  
236 indicating that it was at least 100-fold selective for *Pf*FPPS/GGPPS over human homologs  
237 (Figure 4A-B). In contrast, the most selective bisphosphonate identified by a previous study,  
238 BPH-703, showed only a 2.6-fold selectivity for *Pf*FPPS/GGPPS versus human FPPS and 3.6-  
239 fold selectivity versus human GGPPS in enzymatic assays (Figure 4C-D; 6).

240

### 241 **MMV019313 binds a novel site on *Pf*FPPS/GGPPS, distinct from that of bisphosphonates**

242 The lack of inhibition of human FPPS and GGPPS by MMV019313 was intriguing since  
243 *Pf*FPPS/GGPPS is structurally related to human FPPS and GGPPS and all are inhibited by  
244 bisphosphonates (6). Co-crystal structures have shown that bisphosphonates, zoledronate and its  
245 lipophilic analog BPH-703, bind in the allylic substrate (DMAPP, GPP, or FPP) site in the  
246 *Plasmodium vivax* FPPS/GGPPS homolog (6). This binding is similar to what is observed in

247 bisphosphonate-mammalian FPPS complexes (30-33). To determine whether MMV019313 and  
248 bisphosphonates share a common binding site, we compared the effect of the S228T variant on  
249 inhibition by MMV019313 and the bisphosphonate BPH-703. MMV019313 and BPH-703 both  
250 inhibited wild-type *Pf*FPPS/GGPPS activity. However only MMV019313 inhibition was  
251 decreased by over 10-fold in the S228T variant (Figure 4A-D). This difference in their *in vitro*  
252 enzyme inhibition was consistent with the effect on parasite growth inhibition, in which  
253 moderate overexpression of the S228T variant conferred resistance to MMV019313 but not  
254 BPH-703 (Figure S5). In addition, residue S228 is adjacent to the IPP binding site in the  
255 bisphosphonate-PvFPPS/GGPPS structures and distal from the bound bisphosphonate. These  
256 results demonstrate that MMV019313 has a novel binding mode, distinct from the known allylic  
257 substrate site occupied by bisphosphonates, one which may confer its specificity for *Plasmodium*  
258 FPPS/GGPPS over human homologs.

259 Because our biochemical results indicated that MM019313 binds a new site which is  
260 unique to *Pf*FPPS/GGPPS, we performed molecular docking calculations to evaluate the  
261 likelihood of MMV019313 binding at known small molecule binding sites in *Pf*FPPS/GGPPS.  
262 Three small molecule binding sites have been identified in FPPS and GGPPS enzymes: 1) the  
263 allylic substrate binding site, which is also occupied by bisphosphonates, 2) the IPP binding site,  
264 and 3) an allosteric site identified in *Hs*FPPS (34). Because both the allylic substrate and IPP  
265 sites have been structurally characterized in *Pv*FPPS/GGPPS, we used the rigid body docking  
266 program Glide to generate poses with MMV019313 bound to these sites and estimate the binding  
267 free energy of each pose (35-37). The binding affinity estimated for the MMV019313 poses were  
268  $>10^8$  weaker than bisphosphonate at the allylic site and  $>10^5$  weaker than IPP at its site (Table  
269 S2). Therefore, the modeling suggests that MMV019313 is unlikely to bind either the allylic  
270 substrate or IPP site. We also attempted to dock MMV019313 into other potential binding  
271 pockets in the *Pv*FPPS/GGPPS apo structure but with inconclusive results.

272

## 273 Discussion

274 Farnesyl and geranylgeranyl diphosphate synthase (FPPS and GGPPS) are key branch  
275 point enzymes in isoprenoid biosynthesis. Human cells contain separate FPPS and GGPPS  
276 enzymes. An important class of clinical drugs, nitrogen-containing bisphosphonates, inhibits  
277 human FPPS in osteoclasts and block their function and proliferation (31). Because osteoclasts  
278 are responsible for bone resorption, bisphosphonates are highly effective for treatment of  
279 osteoporosis and other bone remodeling diseases. Bisphosphonates are chemically stable analogs  
280 of inorganic pyrophosphate containing a P-C-P bond in place of the phosphodiester, which  
281 accounts for both its inhibition of FPPS (acting as an analog of the allylic diphosphate substrate)  
282 and its high selectivity for osteoclasts (depositing in bone mineral which is composed of calcium  
283 and phosphate). Unfortunately the charge state of bisphosphonates is a major liability in other  
284 therapeutic applications, as they are poorly bioavailable, rapidly cleared by the kidney, and do  
285 not achieve therapeutic levels in serum for treatment of non-bone diseases (5, 8, 25, 38).

286 *Pf*FPPS/GGPPS, the molecular target of MMV019313 as demonstrated in this study,  
287 closely resembles mammalian FPPS enzymes in sequence, structure, and inhibition by  
288 bisphosphonates (2, 6). Like human FPPS, it is a central node in cellular isoprenoid biosynthesis  
289 vulnerable to drug inhibition (4, 31, 39). In *Plasmodium*, FPP and GGPP are required for the  
290 biosynthesis of prenylated proteins, the prenyl modification of ubiquinone, and other isoprenoid  
291 products, such that inhibition of *Pf*FPPS/GGPPS disrupts multiple cellular pathways (3, 40-43).  
292 Previously lipophilic bisphosphonates modified with an alkyl chain to increase their cell

293 permeability were shown to inhibit *Pv*FPPS/GGPPS homolog and clear both blood- and liver-  
294 stage *Plasmodium* parasites in mice infection models (5, 6). Importantly, these results validated  
295 *Plasmodium* FPPS/GGPPS as an antiparasitic drug target for both acute malaria treatment and  
296 malaria chemoprophylaxis.

297 Our identification of MMV019313 further addresses two key hurdles in the development  
298 of *Pf*FPPS/GGPPS inhibitors as antimalarial drugs. First, MMV019313 represents the first non-  
299 bisphosphonate class of *Plasmodium* FPPS/GGPPS inhibitors with superior physicochemical  
300 properties. Many efforts have been made to develop modified bisphosphonates or non-  
301 bisphosphonate compounds as FPPS and/or GGPPS inhibitors for treatment of soft-tissue  
302 cancers and infectious diseases (34, 44-47). Unlike bisphosphonates, MMV019313 has drug-like  
303 physicochemical properties satisfying the Rule of 5 and does not need to mimic a charged  
304 diphosphate substrate to achieve FPPS/GGPPS inhibition (25). As a compound in the Malaria  
305 Box library, it has already been tested in a panel of bioactivity and pharmacokinetic assays with  
306 encouraging results (25). Furthermore the results of >300 assays characterizing Malaria Box  
307 compounds as part of an innovative “open source” drug discovery effort by many groups will be  
308 a rich source of information (25, 48-50).

309 Second, MMV019313 has high selectivity for *Pf*FPPS/GGPPS over human FPPS and  
310 GGPPS, minimizing the potential for mechanism-based (e.g. “on-target”) toxicity. In fact, we  
311 could not detect any inhibition of human FPPS or GGPPS indicating selectivity at the enzymatic  
312 level of at least 100-fold. Consistent with this lack of enzymatic inhibition, MMV019313  
313 showed no cytotoxicity against a panel of 60 human cancer cell lines at 10  $\mu$ M (25). In contrast,  
314 the most selective bisphosphonate BPH-703 identified by No *et al* showed 2.6-3.6-fold  
315 selectivity in our enzymatic assays (corresponding to a reported therapeutic index of 193 in  
316 growth inhibition assays; 6). Our results suggest that MMV019313 binds a novel site in  
317 *Pf*FPPS/GGPPS that is either absent from or substantially different in the human homologs,  
318 which may explain its high selectivity. Altogether MMV019313 offers a distinct and promising  
319 starting point for development of antimalarial FPPS/GGPPS inhibitors, which circumvents the  
320 inherent liabilities of the bisphosphonate pharmacophore and greatly improves on their  
321 selectivity.

322 Our immediate priority is to obtain structures of the inhibitor-enzyme complex to aid in  
323 structure-based design of MMV019313 derivatives with higher potency, as well as discovery of  
324 additional chemical scaffolds that occupy this new binding site. A potential challenge is that the  
325 FPPS structure is dynamic during catalysis. For example, the human FPPS is known to undergo  
326 at least two critical conformational changes (31): The first is from an “open” apo form to a  
327 “closed” conformation upon binding of the allylic substrate, which is associated with drastically  
328 increased affinity for the allylic substrate (and bisphosphonates that mimic this substrate) as well  
329 as orders the IPP binding pocket. The second structural change occurs upon IPP binding and  
330 sequesters the active site from bulk solvent. Several attempts to obtain co-crystal structures of  
331 MMV019313 with *Pv*FPPS/GGPPS under conditions in which bisphosphonate-*Pv*FPPS/GGPPS  
332 crystals were obtained (presumed to correspond to the “closed” conformation) have been  
333 unsuccessful (personal communication, Dr. Raymond Hui). Additional crystallization conditions  
334 may require testing in the presence and absence of different allylic substrates and IPP, as their  
335 binding could affect the binding of MMV019313. Given the dynamic and complex mechanism  
336 of FPPS and GGPPS enzymes, detailed kinetic characterization of MMV019313 inhibition will  
337 be important to complement structural studies.



338 Since the S228T variant distinguishes between MMV019313 and bisphosphonate binding  
339 to PfFPPS/GGPPS, obtaining its structure to compare with wildtype FPPS/GGPPS will also offer  
340 clues to this new mode-of-inhibition. The resistance caused by the S228T variant could be  
341 explained by a direct contact between Ser228 and MMV019313 in a new small molecule binding  
342 pocket. But because the change from Ser to Thr is quite conservative, the addition of a methyl  
343 group, it seems more likely that Ser228 is involved in conformational dynamics important for  
344 catalysis. Structural analysis of this variant enzyme may reveal altered conformational states  
345 underlying the resistance to MMV019313.

346 Optimization of the bioactivity and pharmacokinetic properties of MMV019313  
347 derivatives will be priorities for their development as antimalarials. The luciferase-based  
348 enzymatic assays performed in our study are robust for detection of effective inhibitors and can  
349 be adapted to high-throughput screening of small molecule libraries (in contrast we found a  
350 commercially-available colorimetric assay was not sufficiently sensitive; 51). Inhibitor-enzyme  
351 structures will greatly accelerate optimization for potency against the *Plasmodium*  
352 FPPS/GGPPS, while simultaneously minimizing binding to the human homologs. *P. falciparum*  
353 strains overexpressing wildtype or the S228T variant, generated during this study, can also be re-  
354 tooled as secondary cellular assays for on-target specificity. The drug properties of MMV019313  
355 derivatives will be optimized in standard absorption-distribution-metabolism-excretion-toxicity  
356 (ADME-T) assays. For example, we found that while MMV019313 is stable to human liver  
357 microsomal enzymes ( $t_{1/2} > 159$  min), its  $t_{1/2}$  in mouse liver microsomes was 4 min. This metabolic  
358 instability may account for a  $< 1 \mu\text{M}$  peak serum concentration following oral administration in  
359 mice and will need to be addressed before derivatives can be tested in mouse models of  
360 *Plasmodium* infection (25).

361 Finally, our study demonstrates two methodological improvements. First, we took  
362 advantage of a quantitative screen for IPP chemical rescue using a range of inhibitor  
363 concentrations, rather than a single high dose. The increased sensitivity allowed us to identify  
364 MMV019313, though it was missed in prior screens. It also permits the screen to be performed  
365 with geranylgeraniol, which is significantly less costly than IPP, since so far all identified  
366 inhibitors that rescue with IPP also show at least a partial rescue of parasite growth inhibition  
367 with geranylgeraniol (24, 52). Second, we employed chemical mutagenesis to select for drug-  
368 resistant mutants, which has not previously been reported in *Plasmodium* to our knowledge but  
369 has been used for genetic screens in *Toxoplasma gondii* (27). Notably we were unable to select  
370 MMV019313-resistant parasites in the absence of chemical mutagenesis, though this same  
371 protocol was effective in selecting drug resistance against MMV008138 when performed in  
372 parallel (23). Our experience suggests that the use of chemical mutagens will increase successful  
373 selection for drug resistance in *Plasmodium* parasites, which is the most common method  
374 employed to identify drug targets from phenotypic drug screens (18-20). The low frequency of *in*  
375 *vitro* MMV019313 resistance also indicates that clinical resistance will also be less frequent to  
376 MMV019313 and its derivatives.

377

378

## 379 **Methods**

380

381 ***P. falciparum* in vitro cultures.** *Plasmodium falciparum* W2 (MRA-157) and Dd2<sup>attB</sup>  
382 (MRA-843) were obtained from MR4. Parasites were grown in human erythrocytes (2%  
383 hematocrit) in RPMI 1640 media supplemented with 0.25% Albumax II (GIBCO Life

384 Technologies), 2 g/L sodium bicarbonate, 0.1 mM hypoxanthine, 25 mM HEPES (pH 7.4), and  
385 50 µg/L gentamycin, at 37°C, 5% O<sub>2</sub>, and 5% CO<sub>2</sub>. For passage of drug-treated, IPP-rescued  
386 parasites, the media was supplemented with 5 µM drug and 200 µM IPP (Isoprenoids LC or  
387 NuChem). For comparison of growth between different treatment conditions, cultures were  
388 carried simultaneously and handled identically with respect to media changes and addition of  
389 blood cells

390  
391 **Chemical handling.** Malaria Box compounds were received as 10 mM DMSO stocks in  
392 96-well plates and diluted three-fold manually in DMSO. Fosmidomycin was included in control  
393 wells. Two-fold serial dilutions of the 96-well plates were performed on Velocity11. Compound  
394 stocks stored in DMSO were diluted for growth assays. MMV019313 was purchased from  
395 ChemDiv

396  
397 **qHTS screen for IPP chemical rescue.** Growth assays were performed in 384-well clear  
398 bottom assay plates (E and K scientific, Santa Clara, CA). Drug (100-400 nL) was added directly  
399 to each well using PinTool (V&P Scientific) on a Sciclone ALH3000 (Caliper Sciences). Using  
400 the Titertek Multidrop 384, first 40 µL of growth media with and without 375 µM IPP was  
401 dispensed, followed by 10 µL ring-stage *P. falciparum* D10 parasites (parasitemia 0.8% in 10%  
402 hematocrit) into 384-well plates using the Titertek Multidrop 384. The final assay consisted of  
403 50 µL ring-stage cultures at 0.8% parasitemia/ 2% hematocrit and drug concentrations from  
404 0.01-26.7 µM ± 300 µM IPP. The plate was incubated at 37°C for 72 h. Parasites were lysed  
405 with 10 µL 5mM EDTA, 1.6% Triton-X, 20mM Tris-HCl and 0.16% Saponin containing 0.1%  
406 Sybr Green I (Invitrogen). The plates were then incubated at -80 °C for 20 min and thawed at  
407 room temperature overnight in the dark. Fluorescence was detected using Flexstation II- 384.  
408 Compounds that showed IPP rescue of growth inhibition at 1 or more drug concentrations in the  
409 initial 384-well high-throughput screen were re-tested in a 96-well growth assay.

410  
411 **Growth inhibition assays to determine EC<sub>50</sub> values.** *P. falciparum* cultures (125 µL)  
412 were grown in 96-well plates containing serial dilution of drugs in triplicate. Media was  
413 supplemented with 200 µM IPP as indicated. Growth was initiated with ring-stage parasites at  
414 1% parasitemia and 0.5% hematocrit. Plates were incubated for 72h. Growth was terminated by  
415 fixation with 1% formaldehyde and parasitized cells were stained with 50 nM YOYO-1  
416 (Invitrogen). Parasitemia was determined by flow cytometry. Data were analyzed by BD C6  
417 Accuri C-Sampler software, and EC<sub>50</sub> curves plotted by GraphPad Prism.

418  
419 ***P. falciparum* mutagenesis and resistance selection.** Late-stage parasites were purified  
420 using a SuperMACS II separator (Miltenyi Biotec) and incubated in complete medium with 8.3 –  
421 2025 µM ethyl methanesulfonate (EMS, 6 concentrations total) for 2 hours. The concentrations  
422 of EMS used were selected by determining the EC<sub>50</sub> in 72h parasite growth inhibition assays.  
423 The highest concentration used for mutagenesis was equal to the EC<sub>50</sub> in order to maximize the  
424 selection pressure. The mutagen was then serially diluted 1:3 to test lower concentrations that  
425 might give lower mutation rates and therefore a lower frequency of passenger mutations.  
426 Mutagenized parasites were washed and separated into wells of 10 mL total volume  
427 (approximately 10% parasitemia, 2 % HCT). MMV019313 drug selection was applied to one  
428 well for each mutagenesis condition at 600 nM (approximately EC<sub>75</sub>), while the other well was  
429 left untreated in order to serve as a control for whole genome sequencing. Parasites were fed

430 daily for the first week and every 3 days thereafter. Each culture was split in half every 6 days in  
431 order to introduce fresh RBC. Drug pressure was maintained for 32 days, with no observable  
432 parasite growth. After 32 days of selection, half of the culture from each EMS condition was  
433 removed from drug pressure. In these cultures, parasites which showed resistance to  
434 MMV019313 by a standard drug assay were observable after 7 days at all EMS conditions used.  
435 The parasites treated with the two lowest concentrations of EMS were selected for whole  
436 genome sequencing.

437  
438 **Whole Genome Sequencing.** *Plasmodium falciparum* strains were sequenced by  
439 Illumina sequencing as described previously (53). Briefly, NEBNext DNA library reagents  
440 (NEB) and NEXTflex DNA barcode adapters (Bioo Scientific) were used to prepare PCR-free  
441 libraries (54). Eight whole genome gDNA libraries were multiplexed and spiked with 8% PhiX  
442 control. Single-end sequencing was performed across two lanes on an Illumina HiSeq 2500  
443 system. Data was analyzed using tools available in the Galaxy platform (55-57). Sequencing  
444 reads were mapped against the *P. falciparum* 3D7v.10.0 reference genome using the Burrows-  
445 Wheeler Alignment tool (58). Sequencing data was visualized using Integrative Genomics  
446 Viewer (IGV) (59, 60). Variants were called using Freebayes (61) and filtered for Quality >100  
447 and Read Depth >30 using GATK tools (62). SnpEff was used to annotate the list of variants  
448 based on the *P. falciparum* 3D7v9.1 reference genome (63). Sequencing data have been  
449 deposited to the SRA.

450  
451 ***P. falciparum* Transfections.** An *E. coli* codon optimized version of *Pf*FPPS/GGPPS  
452 (PF3D7\_1128400) was designed and synthesized by GeneWiz. Quick change mutagenesis was  
453 used to mutate GGPPS serine 228 to a threonine in the pUC vector provided by GeneWiz. These  
454 constructs were then moved into the pLN transfection plasmid designed for Bxb1  
455 mycobacteriophage integrase system (64). The In-fusion cloning kit (Clontech) was used for all  
456 cloning. Restriction enzymes *AvrII* and *BsiWI* were used to linearize the pLN vector. GGPPS  
457 was designed to have a C-terminal GFP tag. All transgenes were driven with either the ribosomal  
458 L2 protein (RL2) promoter (PF3D7\_1132700) or the calmodulin (CaM) promoter  
459 (PF3D7\_1434200) as denoted.

460 Transfections were carried out as previously described (65). Briefly, 400  $\mu$ L fresh red  
461 blood cells were preloaded with 100  $\mu$ g of both pINT, which carries the bacteriophage integrase,  
462 and pRL2, which carries the gene of interest and the blasticidin resistance cassette, using a  
463 BioRad Gene-Pulser Xcell Electroporator. Electroporation conditions were infinite resistance,  
464 310 V, and 950  $\mu$ F using a 2 mm cuvette. Preloaded red blood cells were combined with 2.5 mL  
465 ~20% schizont Dd2<sup>attB</sup> parasites and allowed to recover for 2 days before selection pressure was  
466 applied. Transfected parasites were selected with 2.5  $\mu$ g/mL blasticidin are were detectable by  
467 thin smear within 15 days. Integration was confirmed by PCR and identity of the transgene was  
468 confirmed by sanger sequencing.

469  
470 **Immunoblots.** Parasites expressing either ACP<sub>L</sub>-GFP or one of the FPPS/GGPPS  
471 constructs generated in this study were isolated by saponin lysis and resuspended in 1xNuPage  
472 LDS sample buffer (Invitrogen). Whole cell lysate was separated by SDS-PAGE using 4-12%  
473 Bis-Tris gels (Invitrogen) and transferred to nitrocellulose using a Trans Turbo-blot (BioRad).  
474 Membranes were blocked with 3% BSA, probed with 1:5,000 monoclonal anti-GFP JL-8

475 (BioRad) overnight, washed, then probed with 1:10,000 IRDye 680LT goat-anti-mouse. The  
476 Western was imaged using a Odyssey Imager (LiCor Biosciences).

477  
478 **Live microscopy.** Infected red blood cells were treated with Hoescht to stain the nucleus.  
479 Single z-stack images were collected on an epifluorescence Nikon eclipse.

480  
481 **Quantative PCR.** Quantitative PCR was performed as previously published(21). Briefly,  
482 parasites from 200  $\mu$ L of culture were isolated by saponin lysis followed by PBS wash to remove  
483 extracellular DNA. DNA was purified using DNeasy Blood and Tissue kit (Qiagen). Primers  
484 were designed to target genes found on the apicoplast or nuclear genome: *tufA* (apicoplast) 5'-  
485 GATATTGATTTCAGCTCCAGAAGAAA-3' / 5'-ATATCCATTTGTGTGGCTCCTATAA-3'  
486 and *CHT1* (nuclear) 5'-TGTTTCCTTCAACCCCTTTT-3' / 5'-TGTTTCCTTCAACCCCTTTT-  
487 3'. Reactions contained template DNA, 0.15  $\mu$ M of each primer, and 0.75 $\times$  LightCycler 480  
488 SYBR Green I Master mix (Roche). PCR reactions were performed at 56 $^{\circ}$ C primer annealing  
489 and 65 $^{\circ}$ C template extension for 35 cycles on a Lightcycler 6500 (Roche). For each time point,  
490 the apicoplast:nuclear genome ratio of the fosmidomycin-treated positive control,  
491 chloramphenicol-treated negative control, or MMV019313-treated experiment were calculated  
492 relative to that of an untreated control collected at the same time.

493  
494 **Recombinant protein purification.** Full length constructs of *Pf*FPPS/GGPPS, *Hs*FPPS,  
495 and *Hs*GGPPS were cloned into pET28a with an n-terminal hexahistidine tag. The *P. falciparum*  
496 FPPS/GGPPS was codon optimized for expression in *E. coli* (GeneWiz). *Pf*FPPS/GGPPS was  
497 mutagenized (S228T) using quick change mutagenesis. When expressed in *E. coli*,  
498 *Pf*FPPS/GGPPS (wt and S228T) and *Hs*FPPS were toxic. Cultures were supplemented with 0.4%  
499 glucose and grown to OD<sub>600</sub> of 0.8-1 and induced with 0.5 mM IPTG. *Hs*GGPPS was grown  
500 without supplementation to an OD<sub>600</sub> of 0.8-1. All cultures were induced for 4 hours at 37  $^{\circ}$ C,  
501 then harvested. Cells were lysed in 20 mM HEPES pH 8.0, 150 mM NaCl, 2 mM MgCl<sub>2</sub>, and  
502 protease inhibitor cocktail using sonication. Cleared lysates were either mixed with Talon metal  
503 affinity resin (Clontech) or purified over 5 ml HisTrap columns (GE Healthcare). His tagged  
504 protein was purified with a single step purification eluting with buffer with 300 mM imidazole.  
505 Proteins were dialyzed to remove imidazole and flash frozen.

506  
507 **In vitro FPPS/GGPPS assays.** FPPS/GGPPS activity was measured by monitoring  
508 pyrophosphate release using the Lonza PPiLight kit under kinetic conditions. Drug and either 20  
509  $\mu$ g/ml *Pf*FPPS/GGPPS, 40  $\mu$ g/ml *Hs*GGPPS, or 100  $\mu$ g/ml *Hs*FPPS protein were incubated for  
510 30 min room temperature. The reaction was initiated by the addition of Lonza PPiLight kit  
511 reaction mix and substrates. Saturating substrate conditions were 100  $\mu$ M GPP or FPP, and 200  
512  $\mu$ M IPP. Sub-saturation conditions were K<sub>M</sub> conditions as shown in Figure S4. Luciferase  
513 activity was monitored overtime using a BioTeck plate reader.

514  
515 **MMV019313 ligand docking.** Using a solved *Pv*FPPS/GGPPS structure (PDB: 3EZ3,  
516 zoledronate and IPP bound) as a receptor model protein preparation wizard was used to add back  
517 in missing hydrogens and side chains. All crystallographic waters were removed. Hydrogen  
518 bonds were calculated using Epik at pH 8 ( $\pm$ 1). The protein structure was minimized using OPL3  
519 force field. MMV019313 was docked using glide to receptor grids generated from the relevant  
520 crystallized small molecules.



521  
522

### 523 **Acknowledgements**

524 We are grateful to Medicines for Malaria Ventures (MMV) for providing the Malaria  
525 Box compounds and making this valuable library freely available, as well as GlaxoSmithKline  
526 for their screening efforts that first identified MMV019313 (TCMDC-123889). We would like to  
527 thank Dr. Susmitha Suresh for performing drug screens and Dr. Felice Kelly for advice on how  
528 to chemically mutagenize our parasites for resistance selection. We are grateful to Dr. James  
529 Dunford (University of Oxford) for advice in developing the *in vitro* enzyme activity assays. We  
530 also would like to acknowledge Dr. Wei Zhu and Professor Eric Oldfield (University of Illinois,  
531 Urbana-Champaign) for *in vitro* *P. vivax* GGPPS activity assays and providing BPH-703.

### 533 **Financial Disclosure**

534 Funding support for this project was provided by the Stanford Consortium for Innovation,  
535 Design, Evaluation and Action (C-IDEA), NIH 1K08AI097239 (EY), NIH 1DP5OD012119  
536 (EY), the Burroughs Wellcome Fund Career Award for Medical Scientists (EY), the Burroughs  
537 Wellcome Fund Investigators in Pathogenesis of Infectious Disease (PATH) Award (ML), and  
538 the Stanford School of Medicine Dean's Postdoctoral Fellowship (JEG).

### 541 **References**

- 543 1. Jomaa H, et al. (1999) Inhibitors of the nonmevalonate pathway of isoprenoid biosynthesis  
544 as antimalarial drugs. *Science* 285(5433):1573–1576.
- 545 2. Jordão FM, et al. (2013) Cloning and characterization of bifunctional enzyme farnesyl  
546 diphosphate/geranylgeranyl diphosphate synthase from *Plasmodium falciparum*. *Malar J*  
547 12(1):184.
- 548 3. Tonhosolo R, et al. (2005) Identification, molecular cloning and functional  
549 characterization of an octaprenyl pyrophosphate synthase in intra-erythrocytic stages of  
550 *Plasmodium falciparum*. *Biochem J* 392(Pt 1):117–126.
- 551 4. Artz JD, et al. (2011) Molecular characterization of a novel geranylgeranyl pyrophosphate  
552 synthase from *Plasmodium* parasites. *J Biol Chem* 286(5):3315–3322.
- 553 5. Singh AP, et al. (2010) Lipophilic bisphosphonates are potent inhibitors of *Plasmodium*  
554 liver-stage growth. *Antimicrob Agents Chemother* 54(7):2987–2993.
- 555 6. No JH, et al. (2012) Lipophilic analogs of zoledronate and risedronate inhibit *Plasmodium*  
556 geranylgeranyl diphosphate synthase (GGPPS) and exhibit potent antimalarial activity.  
557 *Proc Natl Acad Sci USA* 109(11):4058–4063.
- 558 7. Michael B Martin, et al. (2001) Bisphosphonates Inhibit the Growth of *Trypanosoma*  
559 *brucei*, *Trypanosoma cruzi*, *Leishmania donovani*, *Toxoplasma gondii*, and *Plasmodium*  
560 *falciparum*: A Potential Route to Chemotherapy. *J Med Chem* 44(6):909–916.



- 561 8. Jordão FM, et al. (2011) In vitro and in vivo antiplasmodial activities of risedronate and  
562 its interference with protein prenylation in *Plasmodium falciparum*. *Antimicrob Agents*  
563 *Chemother* 55(5):2026–2031.
- 564 9. Ghosh S, et al. (2004) Effects of bisphosphonates on the growth of *Entamoeba histolytica*  
565 and *Plasmodium* species in vitro and in vivo. *J Med Chem* 47(1):175–187.
- 566 10. Nallan L, et al. (2005) Protein farnesyltransferase inhibitors exhibit potent antimalarial  
567 activity. *J Med Chem* 48(11):3704–3713.
- 568 11. Eastman RT, et al. (2007) Resistance mutations at the lipid substrate binding site of  
569 *Plasmodium falciparum* protein farnesyltransferase. *Mol Biochem Parasitol* 152(1):66–71.
- 570 12. Eastman RT, et al. (2005) Resistance to a protein farnesyltransferase inhibitor in  
571 *Plasmodium falciparum*. *J Biol Chem* 280(14):13554–13559.
- 572 13. Fernandes JF, et al. (2015) Fosmidomycin as an antimalarial drug: a meta-analysis of  
573 clinical trials. *Future Microbiol* 10(8):1375–1390.
- 574 14. Sinigaglia L, Varenna M, Casari S (2007) Pharmacokinetic profile of bisphosphonates in  
575 the treatment of metabolic bone disorders. *Clin Cases Miner Bone Metab* 4(1):30–36.
- 576 15. Van Voorhis WC, et al. (2007) Efficacy, pharmacokinetics, and metabolism of  
577 tetrahydroquinoline inhibitors of *Plasmodium falciparum* protein farnesyltransferase.  
578 *Antimicrob Agents Chemother* 51(10):3659–3671.
- 579 16. Tsuchiya T, et al. (1982) Pharmacokinetics and metabolism of fosmidomycin, a new  
580 phosphonic acid, in rats and dogs. *Eur J Drug Metab Pharmacokinet* 7(1):59–64.
- 581 17. Spangenberg T, et al. (2013) The open access malaria box: a drug discovery catalyst for  
582 neglected diseases. *PLoS ONE* 8(6):e62906.
- 583 18. Rottmann M, et al. (2010) Spiroindolones, a potent compound class for the treatment of  
584 malaria. *Science* 329(5996):1175–1180.
- 585 19. Gamo FJ, et al. (2010) Thousands of chemical starting points for antimalarial lead  
586 identification. *Nature* 465(7296):305–310.
- 587 20. Guiguemde WA, et al. (2010) Chemical genetics of *Plasmodium falciparum*. *Nature*  
588 465(7296):311–315.
- 589 21. Yeh E, Derisi JL (2011) Chemical rescue of malaria parasites lacking an apicoplast  
590 defines organelle function in blood-stage *Plasmodium falciparum*. *PLoS Biol*  
591 9(8):e1001138.
- 592 22. Bowman JD, et al. (2014) Antiapicoplast and gametocytocidal screening to identify the  
593 mechanisms of action of compounds within the malaria box. *Antimicrob Agents*  
594 *Chemother* 58(2):811–819.

- 595 23. Wu W, et al. (2015) A chemical rescue screen identifies a *Plasmodium falciparum*  
596 apicoplast inhibitor targeting MEP isoprenoid precursor biosynthesis. *Antimicrob Agents*  
597 *Chemother* 59(1):356–364.
- 598 24. DeRisi JL, et al. (2014) *UCSF DeRisi Lab MMV Box Apicoplast Screening* (EMBL-EBI)  
599 doi:10.6019/CHEMBL2448809.
- 600 25. Van Voorhis WC, et al. (2016) Open Source Drug Discovery with the Malaria Box  
601 Compound Collection for Neglected Diseases and Beyond. *PLoS Pathog* 12(7):e1005763.
- 602 26. Amberg-Johnson K, Ganesan SM, Lorenzi HA, Niles JC, Yeh E (2017) A first-in-class  
603 inhibitor of parasite FtsH disrupts plastid biogenesis in human pathogens. *bioRxiv*:108910.
- 604 27. Franco M, et al. (2016) A Novel Secreted Protein, MYR1, Is Central to Toxoplasma's  
605 Manipulation of Host Cells. *MBio* 7(1):e02231–15.
- 606 28. Nkrumah LJ, et al. (2006) Efficient site-specific integration in *Plasmodium falciparum*  
607 chromosomes mediated by mycobacteriophage Bxb1 integrase. *Nat Methods* 3(8):615–  
608 621.
- 609 29. Otto TD, et al. (2010) New insights into the blood-stage transcriptome of *Plasmodium*  
610 *falciparum* using RNA-Seq. *Mol Microbiol* 76(1):12–24.
- 611 30. Rondeau J-M, et al. (2006) Structural Basis for the Exceptional in vivo Efficacy of  
612 Bisphosphonate Drugs. *ChemMedChem* 1(2):267–273.
- 613 31. Kavanagh KL, et al. (2006) The molecular mechanism of nitrogen-containing  
614 bisphosphonates as antiosteoporosis drugs. *Proc Natl Acad Sci USA* 103(20):7829–7834.
- 615 32. Zhang Y, et al. (2013) Chemo-Immunotherapeutic Anti-Malarials Targeting Isoprenoid  
616 Biosynthesis. *ACS Med Chem Lett* 4(4):423–427.
- 617 33. Yokoyama T, et al. (2015) Protonation State and Hydration of Bisphosphonate Bound to  
618 Farnesyl Pyrophosphate Synthase. *J Med Chem* 58(18):7549–7556.
- 619 34. Jahnke W, et al. (2010) Allosteric non-bisphosphonate FPPS inhibitors identified by  
620 fragment-based discovery. *Nat Chem Biol* 6(9):660–666.
- 621 35. Halgren TA, et al. (2004) Glide: a new approach for rapid, accurate docking and scoring.  
622 2. Enrichment factors in database screening. *J Med Chem* 47(7):1750–1759.
- 623 36. Friesner RA, et al. (2004) Glide: a new approach for rapid, accurate docking and scoring.  
624 1. Method and assessment of docking accuracy. *J Med Chem* 47(7):1739–1749.
- 625 37. Friesner RA, et al. (2006) Extra precision glide: docking and scoring incorporating a  
626 model of hydrophobic enclosure for protein-ligand complexes. *J Med Chem* 49(21):6177–  
627 6196.

- 628 38. Cremers SCLM, Pillai G, Papapoulos SE (2005) Pharmacokinetics/pharmacodynamics of  
629 bisphosphonates: use for optimisation of intermittent therapy for osteoporosis. *Clin*  
630 *Pharmacokinet* 44(6):551–570.
- 631 39. Luckman SP, et al. (1998) Nitrogen-containing bisphosphonates inhibit the mevalonate  
632 pathway and prevent post-translational prenylation of GTP-binding proteins, including  
633 Ras. *J Bone Miner Res* 13(4):581–589.
- 634 40. de Macedo CS, Uhrig ML, Kimura EA, Katzin AM (2002) Characterization of the  
635 isoprenoid chain of coenzyme Q in *Plasmodium falciparum*. *FEMS Microbiol Lett*  
636 207(1):13–20.
- 637 41. Tonhosolo R, et al. (2009) Carotenoid biosynthesis in intraerythrocytic stages of  
638 *Plasmodium falciparum*. *J Biol Chem* 284(15):9974–9985.
- 639 42. Gabriel HB, et al. (2015) Squalenstatin is an inhibitor of carotenoid biosynthesis in  
640 *Plasmodium falciparum*. *Antimicrob Agents Chemother* 59(6):3180–3188.
- 641 43. Chakrabarti D, et al. (2002) Protein farnesyltransferase and protein prenylation in  
642 *Plasmodium falciparum*. *J Biol Chem*. doi:10.1074/jbc.M202860200.
- 643 44. Chen S-H, Lin S-W, Lin S-R, Liang P-H, Yang J-M (2013) Moiety-linkage map reveals  
644 selective nonbisphosphonate inhibitors of human geranylgeranyl diphosphate synthase. *J*  
645 *Chem Inf Model* 53(9):2299–2311.
- 646 45. Liu J, et al. (2014) Syntheses and characterization of non-bisphosphonate quinoline  
647 derivatives as new FPPS inhibitors. *Biochim Biophys Acta* 1840(3):1051–1062.
- 648 46. Marzinzik AL, et al. (2015) Discovery of Novel Allosteric Non-Bisphosphonate Inhibitors  
649 of Farnesyl Pyrophosphate Synthase by Integrated Lead Finding. *ChemMedChem*  
650 10(11):1884–1891.
- 651 47. Zhang Y, et al. (2009) Lipophilic bisphosphonates as dual farnesyl/geranylgeranyl  
652 diphosphate synthase inhibitors: an X-ray and NMR investigation. *J Am Chem Soc*  
653 131(14):5153–5162.
- 654 48. Ullah I, Sharma R, Biagini GA, Horrocks P (2017) A validated bioluminescence-based  
655 assay for the rapid determination of the initial rate of kill for discovery antimalarials. *J*  
656 *Antimicrob Chemother* 72(3):717–726.
- 657 49. Allman EL, Painter HJ, Samra J, Carrasquilla M, Llinás M (2016) Metabolomic Profiling  
658 of the Malaria Box Reveals Antimalarial Target Pathways. *Antimicrob Agents Chemother*  
659 60(11):6635–6649.
- 660 50. Paul AS, Moreira CK, Elsworth B, Allred DR, Duraisingh MT (2016) Extensive Shared  
661 Chemosensitivity between Malaria and Babesiosis Blood-Stage Parasites. *Antimicrob*  
662 *Agents Chemother* 60(8):5059–5063.

- 663 51. Crowther GJ, et al. (2011) Identification of inhibitors for putative malaria drug targets  
664 among novel antimalarial compounds. *Mol Biochem Parasitol* 175(1):21–29.
- 665 52. Zhang B, et al. (2011) A second target of the antimalarial and antibacterial agent  
666 fosmidomycin revealed by cellular metabolic profiling. *Biochemistry* 50(17):3570–3577.
- 667 53. Straimer J, et al. (2012) Site-specific genome editing in *Plasmodium falciparum* using  
668 engineered zinc-finger nucleases. *Nat Methods* 9(10):993–998.
- 669 54. Kozarewa I, et al. (2009) Amplification-free Illumina sequencing-library preparation  
670 facilitates improved mapping and assembly of (G+C)-biased genomes. *Nat Methods*  
671 6(4):291–295.
- 672 55. Giardine B, et al. (2005) Galaxy: a platform for interactive large-scale genome analysis.  
673 *Genome Res* 15(10):1451–1455.
- 674 56. Blankenberg D, et al. (2010) Galaxy: a web-based genome analysis tool for  
675 experimentalists. *Curr Protoc Mol Biol* Chapter 19:Unit 19.10.1–21.
- 676 57. Goecks J, Nekrutenko A, Taylor J, Galaxy Team (2010) Galaxy: a comprehensive  
677 approach for supporting accessible, reproducible, and transparent computational research  
678 in the life sciences. *Genome Biol* 11(8):R86.
- 679 58. Li H, Durbin R (2009) Fast and accurate short read alignment with Burrows-Wheeler  
680 transform. *Bioinformatics* 25(14):1754–1760.
- 681 59. Robinson JT, et al. (2011) Integrative genomics viewer. *Nat Biotechnol* 29(1):24–26.
- 682 60. Thorvaldsdóttir H, Robinson JT, Mesirov JP (2013) Integrative Genomics Viewer (IGV):  
683 high-performance genomics data visualization and exploration. *Brief Bioinformatics*  
684 14(2):178–192.
- 685 61. Garrison E, Marth G Haplotype-based variant detection from short-read sequencing.  
686 <https://arxiv.org/abs/2012>.
- 687 62. Van der Auwera GA, et al. (2013) From FastQ data to high confidence variant calls: the  
688 Genome Analysis Toolkit best practices pipeline. *Curr Protoc Bioinformatics* 43:11.10.1–  
689 33.
- 690 63. Cingolani P, et al. (2012) Using *Drosophila melanogaster* as a Model for Genotoxic  
691 Chemical Mutational Studies with a New Program, SnpSift. *Front Genet* 3:35.
- 692 64. Adjalley SH, Lee MCS, Fidock DA (2010) A method for rapid genetic integration into  
693 *Plasmodium falciparum* utilizing mycobacteriophage Bxb1 integrase. *Methods Mol Biol*  
694 634:87–100.
- 695 65. Spalding MD, Allary M, Gallagher JR, Prigge ST (2010) Validation of a modified method  
696 for Bxb1 mycobacteriophage integrase-mediated recombination in *Plasmodium*

697 *falciparum* by localization of the H-protein of the glycine cleavage complex to the  
698 mitochondrion. *Mol Biochem Parasitol* 172(2):156–160.

## 699 Tables

700

701 **Table 1. Summary of mutations identified by whole genome sequencing**

| Gene ID <sup>a</sup> | Description <sup>b</sup>                      | Base Call <sup>c</sup> |    |     | AA change | Population | Read Number <sup>d</sup> |     | % <sup>e</sup> |      |
|----------------------|-----------------------------------------------|------------------------|----|-----|-----------|------------|--------------------------|-----|----------------|------|
|                      |                                               | Position               | WT | EMS |           |            | WT1                      | R   | WT2            | R    |
| PF3D7_1128400        | Geranylgeranyl pyrophosphate synthase (GGPPS) | 682                    | T  | A   | S228T     | 019313R1   | 219                      | 163 | 100            | 100  |
|                      |                                               |                        |    |     |           | 019313R2   | 186                      | 181 | 100            | 62.4 |

702 <sup>a</sup> PlasmoDB gene Identification number

703 <sup>b</sup> Basic gene description based on PlasmoDB functional assignments

704 <sup>c</sup> WT calls match 3D7 reference genome

705 <sup>d</sup> Read depth corresponding to WT call (IGV) and Mut call (SnpEff) respectively

706 <sup>e</sup> Percent of reads corresponding to WT call (IGV) and Mut call (SnpEff) respectively

707

708

709

710

## Figures and figure legends

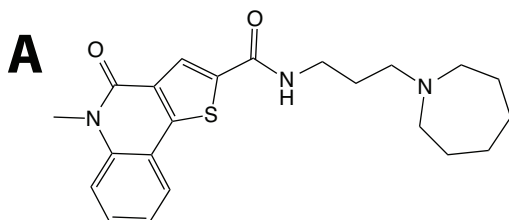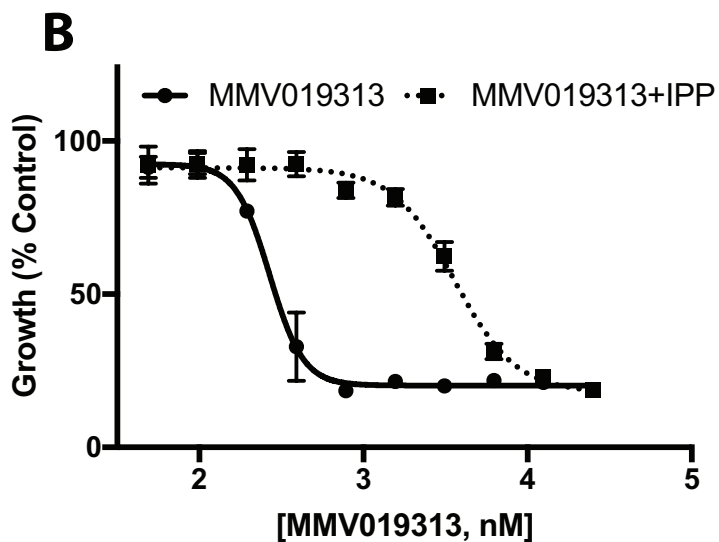

711

712



713 **Figure 1. IPP rescues growth inhibition by MMV019313. A.** The structure of MMV019313.  
 714 **B.** EC<sub>50</sub> curves in the absence (solid line) and presence (dotted line) of IPP. Parasitemia is  
 715 normalized to that of an untreated control.  
 716  
 717  
 718

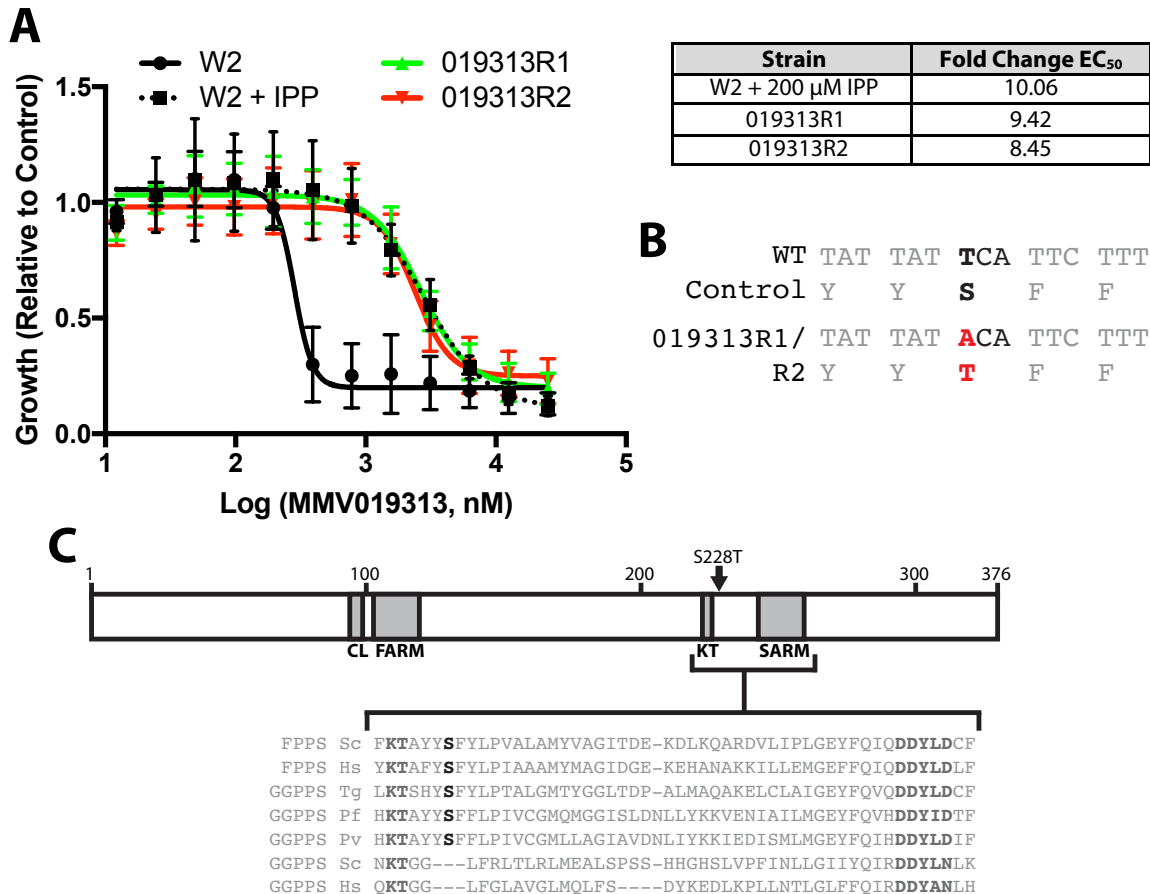

719 **Figure 2. MMV019313-resistant parasites contain a mutation in the bifunctional farnesyl**  
 720 **and geranylgeranyl diphosphate synthase. A.** EC<sub>50</sub> curves of parental W2 parasites alone  
 721 (black, solid line) and with IPP supplementation (black, dotted line) and the two resistant  
 722 populations (019313R1, red line, and 019313R2, green line) without IPP added. Fold change in  
 723 EC<sub>50</sub> compared to W2 parasites is shown in the right. **B.** Mutation determined by whole genome  
 724 sequencing of resistant populations 019313R1 and 019313R2, highlighted in red **C.** Schematic  
 725 of *Pf*FPPS/GGPPS protein. The S228T residue is highlighted in bold black while conserved KT  
 726 and SARM residues are highlighted in bold grey and underlined.  
 727  
 728

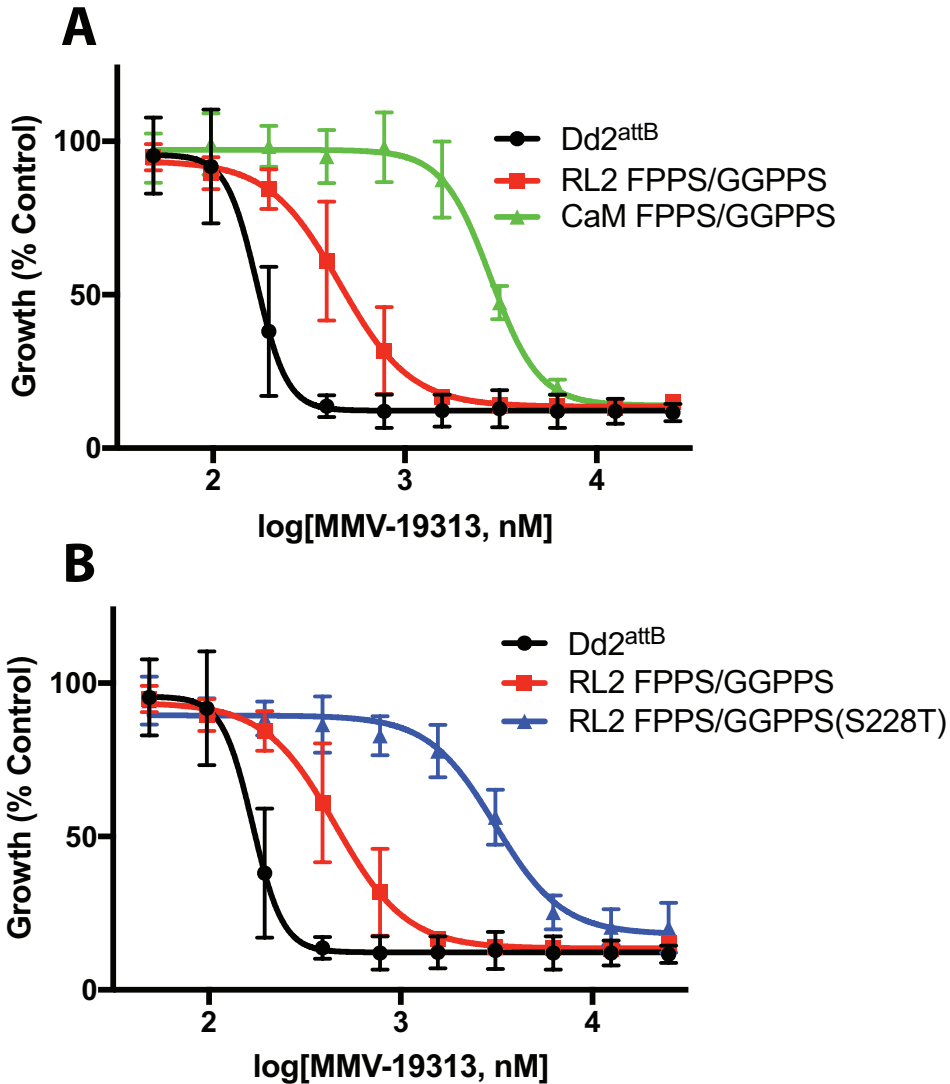

729  
730  
731  
732  
733  
734  
735

**Figure 3. Overexpression of WT and an S228T variant of *Pf*FPPS/GGPPS confer resistance to MMV019313.** A. EC<sub>50</sub> curves of MMV019313 against the parental Dd2<sup>attB</sup> parasites (black) and parasites over-expressing FPPS/GGPPS-GFP under the RL2 (red) or CaM (green) promoter. B. EC<sub>50</sub> curves of MMV019313 against the parental Dd2<sup>attB</sup> parasites (black) and parasites over-expressing wild type (red) or mutant (S228T, blue) FPPS/GGPPS-GFP under the RL2 promoter.

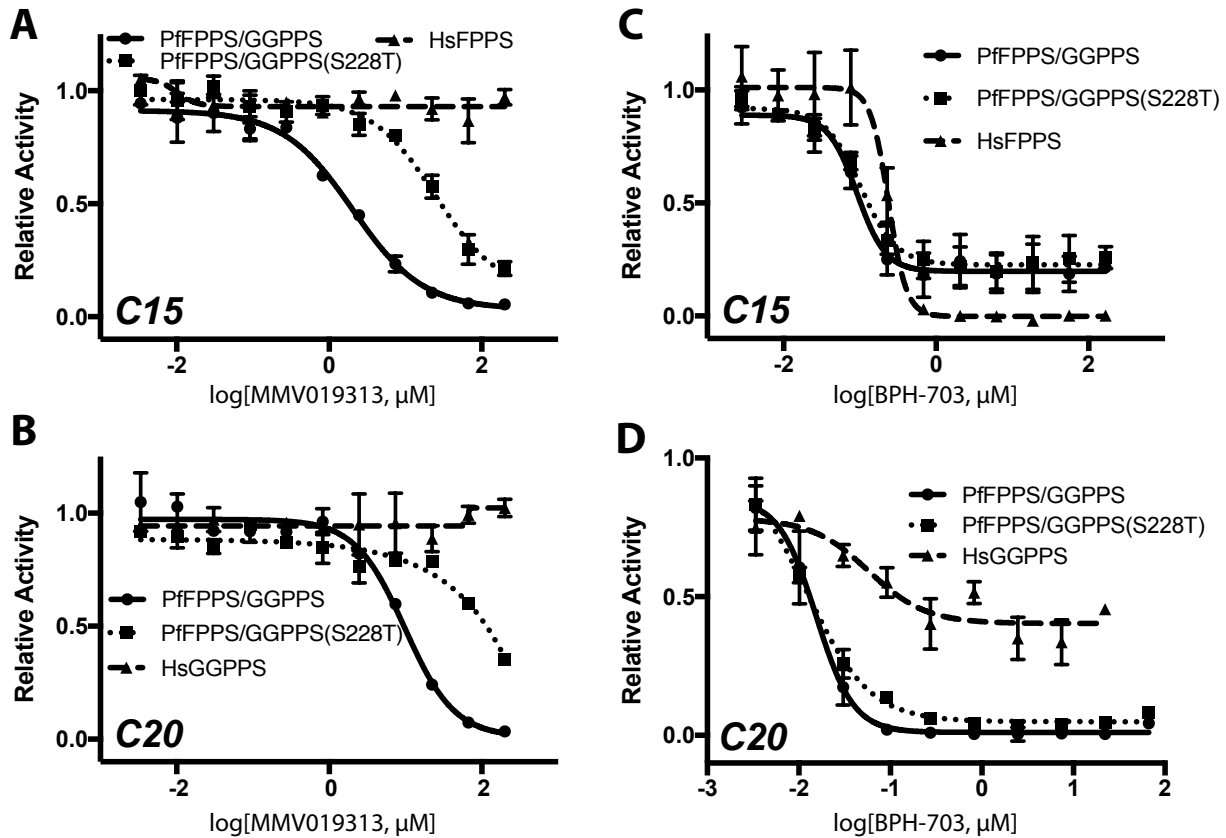

736  
737  
738  
739  
740  
741  
742  
743  
744  
745

**Figure 4. MMV019313 has a specific and distinct mode-of-inhibition against purified *Pf*FPPS/GGPPS.** Dose-dependent inhibition of wild-type *Pf*FPPS/GGPPS (solid), *Pf*FPPS/GGPPS S228T variant (dotted), and either human FPPS or GGPPS (dashed) of **A.** FPP (C15) production by MMV019313, **B.** GGPP (C20) production by MMV019313, **C.** FPP (C15) production by BPH-703, and **D.** GGPP (C20) production by BPH-703. Partial inhibition of *Hs*GGPPS by BPH-703 was observed under  $k_{cat}$  conditions, while complete inhibition was observed under non-saturating conditions (**Figure S5**).
